# Supplementary material for: The design of an extended multiple resonance TADF emitter based on a polycyclic amine/carbonyl system
Source: Royal Society of Chemistry journal article supplement (doi:10.1039/d0qm00190b), 2020-01-01
Supplement: d0qm00190b1.pdf [file d0qm00190b1.pdf]

## Supporting Information

### **The design of extended Multiple Resonance Thermally Activated Delayed Fluorescence emitter based on polycyclic amine/carbonyl system**

Dianming Sun,<sup>a,b</sup> Subeesh Madayanad Suresh,<sup>b</sup> David Hall,<sup>b,c</sup> Ming Zhang,<sup>a</sup> Changfeng Si,<sup>b</sup> David B. Cordes,<sup>b</sup> Alexandra  
M. Z. Slawin,<sup>b</sup> Yoann Olivier,<sup>c,d\*</sup> Xiaohong Zhang<sup>a\*</sup> and Eli Zysman-Colman<sup>b\*</sup>

<sup>a</sup> *Institute of Functional Nano & Soft Materials (FUNSOM) and Jiangsu Key Laboratory for Carbon-Based Functional  
Materials & Devices, Soochow University, Suzhou, Jiangsu 215123, P.R. China. \*E-mail: [xiaohong\\_zhang@suda.edu.cn](mailto:xiaohong_zhang@suda.edu.cn)*

<sup>b</sup> *Organic Semiconductor Centre, EaStCHEM School of Chemistry, University of St Andrews, St Andrews KY16 9ST, UK.  
\*E-mail: [eli.zysman-colman@st-andrews.ac.uk](mailto:eli.zysman-colman@st-andrews.ac.uk); <http://www.zysman-colman.com>*

<sup>c</sup> *Laboratory for Chemistry of Novel Materials, University of Mons, 7000, Mons, Belgium*

<sup>d</sup> *Unité de Chimie Physique Théorique et Structurale & Laboratoire de Physique du Solide, Namur Institute of Structured  
Matter, Université de Namur, Rue de Bruxelles, 61, 5000 Namur, Belgium.*

## Table of Contents

|                                     |    |
|-------------------------------------|----|
| General methods .....               | 3  |
| Experimental Section.....           | 6  |
| Theoretical calculation .....       | 9  |
| Photophysical characterization..... | 12 |
| Reference .....                     | 26 |

## General methods

**Synthesis and characterization.** All commercial chemicals were used as received without further purification. Synthesis of compound **3** and **DDiKTa** were performed using standard Schlenk techniques under nitrogen atmosphere. Dry solvents were collected from solvent purification system. Column chromatography was performed using silica gel (Silia-P from Silicycle, 60 Å, 40 to 63 µm). Analytical thin layer chromatography (TLC) was performed with silica plates on polymer matrix (250 µm with indicator F-254), and compounds were checked under UV light-254 and -365 nm. <sup>1</sup>H and <sup>13</sup>C solution-phase NMR spectra were recorded on a Bruker Avance spectrometer operating at 11.7 T (Larmor frequencies of 400 MHz and 101MHz or 500 MHz and 126 MHz, respectively) in CDCl<sub>3</sub> and CD<sub>2</sub>Cl<sub>2</sub>. The following abbreviations have been used for multiplicity assignments: “s” for singlet, “d” for doublet, “t” for triplet, “m” for multiplet, and “br” for broad. Melting points (Mps) were recorded using open-ended capillaries on an electrothermal melting point apparatus and are uncorrected.

**Electrochemistry measurements.** Cyclic Voltammetry (CV) and Differential pulse voltammetry (DPV) analysis were performed on an Electrochemical Analyzer potentiostat model 620D from CH Instruments. The sample was prepared in dichloromethane (DCM) solution, which was degassed by sparging with DCM-saturated nitrogen gas for 5 minutes prior to measurement. All measurements were performed using 0.1 M tetra-*n*-butylammonium hexafluorophosphate, [nBu<sub>4</sub>N]PF<sub>6</sub>. An Ag/Ag<sup>+</sup> electrode was used as the reference electrode; a glassy carbon electrode was used as the working electrode and a platinum electrode was used as the counter electrode. The redox potentials are reported relative to a saturated calomel electrode (SCE) with a ferrocene/ferrocenium (Fc/Fc<sup>+</sup>) redox couple as the internal standard (0.46 V vs SCE).<sup>1</sup> The HOMO and LUMO energies were determined using the relation  $E_{\text{HOMO/LUMO}} = -(E_{\text{ox}}/E_{\text{red}} + 4.8)$  eV, where  $E_{\text{ox}}$  and  $E_{\text{red}}$  are the values of the anodic and cathodic peak potentials, respectively calculated from DPV relative to Fc/Fc<sup>+</sup>.<sup>2</sup>

**Quantum chemical calculations.** The calculations were performed with the Gaussian 09 revision D.018 suite<sup>3</sup> for the Density Functional Theory (DFT) calculations and with the Turbomole/6.5 package<sup>3</sup> for Spin-Component Scaling Coupled-Cluster second-order approximate Coupled-Cluster (SCS-CC2) calculations.

Molecular orbitals isocontour plots were obtained based on the gas-phase ground state-optimized structures using the PBE0 functional<sup>4</sup> and the 6-31G (d, p) basis set<sup>5</sup> in the gas phase. Molecular orbitals were visualized using GaussView 5.0.<sup>6</sup> Excited state calculations were performed using the SCS-CC2 method with the cc-pVDZ basis set.<sup>7</sup> We first optimized the ground state at the SCS-CC2 level and vertical transitions to excited states were calculated based on the SCS-CC2 optimized ground state-optimized structure. Difference density plots were used to track the change in electronic density between the ground and the singlet or triplet excited states and were visualized using the VESTA package.<sup>8</sup>

**Photophysical measurements.** All samples were prepared in HPLC grade solvents with varying concentrations on the order of  $10^{-5}$  or  $10^{-6}$  M for absorption and emission study. Absorption spectra were recorded at RT using a Shimadzu UV-1800 double beam spectrophotometer with a 1 cm quartz cuvette. Molar absorptivity determination was verified by linear least-squares fit of values obtained from at least five independent solutions at varying concentrations on the order of  $2.30 \times 10^{-5}$  to  $8.44 \times 10^{-5}$  M. For emission studies, aerated solutions were bubbled by compressed air for 5 minutes and degassed solutions were prepared via three freeze-pump-thaw cycles and spectra were taken using home-made Schlenk quartz cuvette. Steady-state emission and excitation spectra and time-resolved emission spectra were recorded at 298 K using an Edinburgh Instruments F980 fluorimeter. Samples were excited at 340 nm using a Xenon lamp for steady-state measurements and at 378 nm using a pico-second laser (PicoQuant, LDH-D-C-375) driven by a laser driver (PDL 800-D) for time-resolved emission spectra. The singlet-triplet splitting energy,  $\Delta E_{ST}$ , was determined from the energy difference between the onsets of the prompt fluorescence and the delayed phosphorescence spectra in toluene glass at 77 K using a Jasco FP-8600 fluorimeter. Photoluminescence quantum yields for solutions were determined using the optically dilute method<sup>9</sup> in which four sample solutions with absorbances of ca. 0.10, 0.080, 0.060 and 0.040 at 340 nm were used. Their emission intensities were compared with those of a reference, quinine sulfate, whose quantum yield ( $\Phi_r$ ) in 1 N  $H_2SO_4$  was determined to be 54.6% using absolute method.<sup>10</sup> The quantum yield of the sample,  $\Phi_{PL}$ , can be determined by the equation  $\Phi_{PL} = \Phi_r (A_r/A_s)(I_s/I_r)(n_s/n_r)^2$ , where A stands for the absorbance at the excitation wavelength ( $\lambda_{exc}$ =340 nm), I is the integrated area under the corrected emission curve and n is the refractive index of the solvent with the subscripts “s” and “r” representing sample and reference respectively. Film sample was prepared on sapphire

substrates and cooled to 77 K in a cold finger cryostat (Oxford Instruments). The sample was photoexcited using a femtosecond laser emitting at 343 nm (Orpheus-N, model: PN13F1). Emission from the sample was focused onto a spectrograph (Chromex imaging, 250 is spectrograph) and detected with a sensitive gated iCCD camera (Stanford Computer Optics, 4Picos) having sub-nanosecond resolution. Prompt fluorescence spectra were integrated by the iCDD for 10 ns – 100 ns after the laser excitation. Phosphorescence spectra were integrated by the iCDD for 1 ms – 10 ms after the laser excitation. Thin film  $\Phi_{\text{PL}}$  measurements were performed using an integrating sphere in a Hamamatsu C9920-02 system.<sup>11</sup> Samples were excited at 340 nm by a xenon lamp coupled to a monochromator. The output was then fed into the integrating sphere via a fiber, exciting the sample. The PL was collected with a multimode fiber and detected with a back-thinned CCD (BT-CCD) detector. The thin film  $\Phi_{\text{PL}}$  were then measured by purging the integrating sphere with N<sub>2</sub> gas flow.

**X-Ray crystallography.** Crystals of Compound **2** were obtained by diffusing hexane into a saturated solution of compound **2** in chloroform. X-ray diffraction data were collected at 173 K using a Rigaku FR-X Ultrahigh brilliance Microfocus RA generator/confocal optics with XtaLAB P200 diffractometer [Mo K $\alpha$  radiation ( $\lambda$  = 0.71075 Å)]. Intensity data were collected using  $\omega$ -steps accumulating area detector images spanning at least a hemisphere of reciprocal space. Data were collected using CrystalClear<sup>12</sup> and processed (including correction for Lorentz polarization and absorption) using CrysAlisPro.<sup>13</sup> Structures were solved by dual-space methods (SHELXT-2018/2)<sup>15</sup> and refined by full-matrix least-squares against F<sup>2</sup> (SHELXL-2018/3). Non-hydrogen atoms were refined anisotropically, and hydrogen atoms were refined using a riding model. All calculations were performed using the Olex2<sup>15</sup> interface. A view of the structure is presented in Figure S16. CCDC 1992507 contains the supplementary crystallographic data for this paper. The data can be obtained free of charge from The Cambridge Crystallographic Data Centre via [www.ccdc.cam.ac.uk/structures](http://www.ccdc.cam.ac.uk/structures).

Crystal data. C<sub>20</sub>H<sub>10</sub>INO<sub>2</sub>,  $M$  = 423.19, triclinic,  $a$  = 8.0823(2),  $b$  = 8.3105(2),  $c$  = 11.8907(4) Å,  $\alpha$  = 83.340(2),  $\beta$  = 80.164(2),  $\gamma$  = 69.285(2) °,  $U$  = 734.72(4) Å<sup>3</sup>,  $T$  = 173 K, space group  $P\bar{1}$  (no. 2),  $Z$  = 2, 9702 reflections measured, 3241 unique ( $R_{\text{int}}$  = 0.0382), which were used in all calculations. The final  $R_1$  [ $I > 2\sigma(I)$ ] was 0.0326 and  $wR_2$  (all data) was 0.0795.

**OLED fabrication and characterization.** OLED devices were fabricated in bottom-emitting architecture. A pre-patterned indium tin oxide (ITO) glass substrate with a sheet resistance of 15  $\Omega$  square<sup>-1</sup> was pre-cleaned

carefully with detergent and deionized water and then exposed to UV-ozone for 15 min. The small molecules for each layer were thermally evaporated using a vacuum chamber with a base pressure of  $4 \times 10^{-4}$  Pa and deposited at a rate of 1 Å/s, which was controlled in situ using the quartz crystal monitors. The electron injection layer, LiF, was deposited at a rate of 0.1 Å/s while the Al cathode was deposited at a rate of 10 Å/s through the shadow mask defining the top electrode. The spatial overlap of the anode and cathode electrodes determined the active area of the OLED, which was estimated to be 9 mm<sup>2</sup>. Electroluminescence (EL), CIE colour coordinates, and spectra were obtained via a Spectrascan PR655 photometer and the luminance-current-voltage characteristics were determined with a computer-controlled Keithley 2400 Source meter. The external quantum yield (EQE) was calculated from the current density, luminance, and EL spectrum, assuming a Lambertian emission distribution.

## Experimental Section

### Synthesis of dimethyl 2,2'-((4-iodophenyl)azanediyl)dibenzoate (**1**)

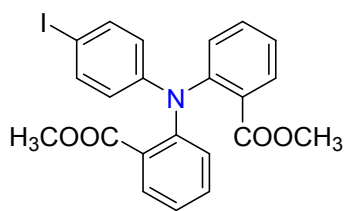

To a 100 mL two-neck flask were added dimethyl 2,2'-(phenylazanediyl)dibenzoate (3.6 g, 10 mmol, 1 equiv.) and 30 mL acetonitrile. After dissolution, *N*-iodosuccinimide (2.7 g, 12 mmol, 1.2 equiv.) dissolved in 20 mL acetonitrile was added dropwise. The reaction was stirred at room temperature for 12 h. The reaction was quenched with 10 mL 0.1 M sodium hydroxide solution and extracted with 50 mL DCM. The organic layer was separated, washed by water (3 × 50 mL), dried with anhydrous magnesium sulfate and concentrated under reduced pressure. The crude product was purified by silica gel column chromatography (hexane: ethyl acetate = 10:1) to afford the desired product as a white solid. **Yield:** 85% (3.1 g). **R<sub>f</sub>:** 0.49 (hexane: ethyl acetate = 5:2). **M<sub>p</sub>:** 130-131 °C. **<sup>1</sup>H NMR** (500 MHz, CD<sub>2</sub>Cl<sub>2</sub>) δ 7.71 (dd, *J* = 7.7, 1.7 Hz, 2H), 7.49 (ddd, *J* = 8.1, 7.4, 1.7 Hz, 2H), 7.46 – 7.42 (m, 2H), 7.27 – 7.21 (m, 4H), 6.52 – 6.48 (m, 2H), 3.46 (s, 6H). **<sup>13</sup>C NMR** (126 MHz, CD<sub>2</sub>Cl<sub>2</sub>) δ 167.29, 148.56, 145.65, 137.60, 132.81, 130.96, 129.08, 128.20, 124.70, 121.85, 83.12, 53.89, 53.68, 53.46, 53.25, 53.03, 51.75.

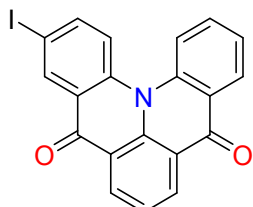

### Synthesis of 3-iodoquinolino[3,2,1-de]acridine-5,9-dione (**2**)

Compound **1** (1.8 g, 5 mmol, 1 equiv.) was combined with sodium hydroxide (1 g, 25 mmol, 5 equiv.) in 20 mL of an ethanol/water (1:1) mixture. The reaction was heated to reflux for 12 h. After cooling to room temperature, the pH was adjusted to 2-3 by addition of dilute hydrochloric acid (HCl). The diacid solid precipitated from the solution and was collected by vacuum filtration, washed thoroughly with water to remove residual salts and HCl and then dried under vacuum. This solid was then used directly by dispersing it into 60 mL dichloromethane under a nitrogen atmosphere. To the reaction mixture were added sequentially thionyl chloride (0.7 mL, 10.0 mmol, 2 equiv.) and a few drops of DMF. After 3 h under reflux, the reaction mixture was cooled to room temperature. Under a positive flow of nitrogen, aluminum chloride (6.7 g, 50 mmol, 10 equiv.) was added slowly (exothermic reaction). The reaction mixture was brought to reflux and stirred for 12 h. The reaction mixture was cooled to room temperature and the reaction was quenched by dropwise addition of water with vigorous

stirring (exothermic reaction). The resulting mixture was extracted with dichloromethane ( $3 \times 50$  mL), the organic fraction was separated and then concentrated under reduced pressure. The mixture was then washed with hexane and recrystallized from boiling THF. The crystals were filtered to afford the desired product as a yellow solid. **Yield:** 42% (0.89 g). **R<sub>f</sub>:** 0.34 (hexane: ethyl acetate=5:2). **Mp:** 284-285 °C. **<sup>1</sup>H NMR** (400 MHz, CDCl<sub>3</sub>)  $\delta$  8.93 – 8.84 (m, 3H), 8.56 (dd,  $J$  = 8.0, 1.6 Hz, 1H), 8.17 (dd,  $J$  = 8.6, 0.9 Hz, 1H), 8.08 (dd,  $J$  = 9.0, 2.1 Hz, 1H), 7.99 (d,  $J$  = 9.0 Hz, 1H), 7.88 – 7.78 (m, 2H), 7.64 (ddd,  $J$  = 8.0, 7.1, 1.0 Hz, 1H). **<sup>13</sup>C NMR** (101 MHz, CDCl<sub>3</sub>)  $\delta$  142.31, 139.59, 139.00, 136.73, 134.95, 134.76, 134.23, 128.28, 126.47, 124.73, 122.31, 120.47, 118.47, 115.64, 112.81, 109.98, 89.83. **HRMS** [M+H]<sup>+</sup> Calculated: 423.9834 (C<sub>20</sub>H<sub>11</sub>INO<sub>2</sub>); Found:423.9822.

### Synthesis of 3-(4,4,5,5-tetramethyl-1,3,2-dioxaborolan-2-yl)quinolino[3,2,1-de]acridine-5,9-dione (3)

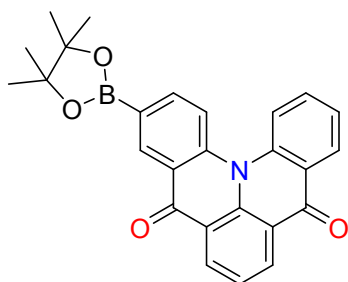

Compound **2** (4.2 g, 10 mmol, 1 equiv.), bis(pinacolato)diboron (3.3 g, 13 mmol, 1.3 equiv.), Pd(dppf)Cl<sub>2</sub> (366 mg, 0.5 mmol, 0.05 equiv.) and KOAc (3.0 g, 30 mmol, 3 equiv.) were dissolved in *N,N*-dimethylformamide (50 mL), and were heated to 100 °C under a nitrogen atmosphere for 6 h. The mixture was cooled to room temperature and then filtered through Celite. The organic phase was collected and concentrated under reduced pressure. The crude product was purified by silica gel column chromatography (hexane: ethyl acetate = 5:1) to afford the desired product as a yellow solid. **Yield:** 87% (3.68 g). **R<sub>f</sub>:** 0.26 (hexane: ethyl acetate=5:2). **Mp:** 272-273 °C. **<sup>1</sup>H NMR** (500 MHz, CD<sub>2</sub>Cl<sub>2</sub>)  $\delta$  8.81 (d,  $J$  = 1.5 Hz, 1H), 8.70 – 8.65 (m, 2H), 8.42 (dd,  $J$  = 7.9, 1.6 Hz, 1H), 8.11 (dd,  $J$  = 8.5, 5.8 Hz, 2H), 8.04 (dd,  $J$  = 8.5, 1.6 Hz, 1H), 7.71 (ddd,  $J$  = 8.7, 7.2, 1.6 Hz, 1H), 7.64 (t,  $J$  = 7.6 Hz, 1H), 7.52 – 7.48 (m, 1H), 1.38 (s, 12H). **HRMS** [M+H]<sup>+</sup> Calculated: 424.1720 (C<sub>26</sub>H<sub>23</sub>BNO<sub>4</sub>); Found:424.1710.

### Synthesis of [3,3'-biquinolino[3,2,1-de]acridine]-5,5',9,9'-tetraone (DDiKTa)



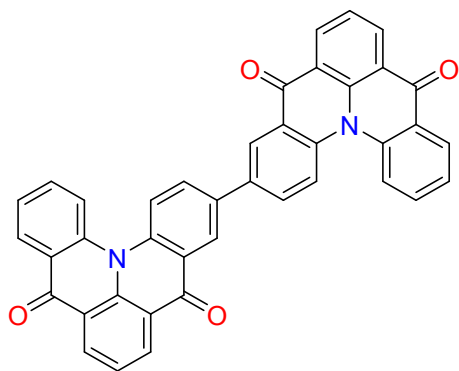

Compound **2** (0.85 g, 2 mmol, 1 equiv.), compound **3** (0.85 g, 2 mmol, 1 equiv.), Pd(PPh<sub>3</sub>)<sub>4</sub> (116 mg, 0.1 mmol, 0.05 equiv.), 2M Na<sub>2</sub>CO<sub>3</sub> (2 mL) and THF (50 mL) were combined under a nitrogen atmosphere. The reaction mixture was heated to reflux and stirred for 12 h. The reaction mixture was cooled to room temperature and the product was filtered and washed with water (3 × 50 mL) and THF (3 × 30 mL) to

afford the desired product as a yellow solid. **Yield:** 65% (0.77 g). **R<sub>f</sub>:** 0.31 (hexane: ethyl acetate = 5:2). **Mp:** >400 °C. **<sup>1</sup>H NMR** (400 MHz, Chloroform-*d*) δ 8.94 (d, *J* = 6.5 Hz, 3H), 8.65 – 8.55 (m, 1H), 8.44 (d, *J* = 8.8 Hz, 1H), 8.31 (dd, *J* = 8.5, 5.3 Hz, 2H), 7.88 (dt, *J* = 23.0, 7.7 Hz, 2H), 7.69 (t, *J* = 7.5 Hz, 1H). **<sup>13</sup>C NMR** (101 MHz, Chloroform-*d*) δ 139.77, 139.60, 139.12, 138.88, 136.07, 135.02, 134.74, 134.24, 132.34, 128.27, 126.54, 125.75, 124.73, 121.91, 120.73, 118.49, 115.66, 112.83, 110.00.

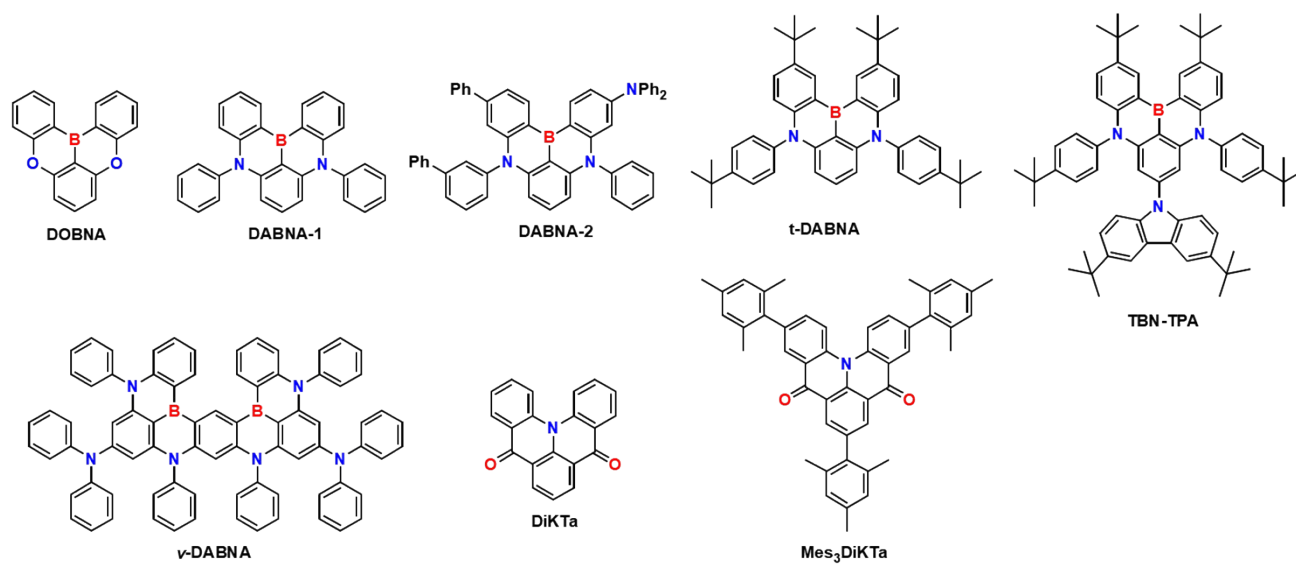

**Figure S1.** Chemical structures of previously reported MR TADF emitters.

## Theoretical calculations

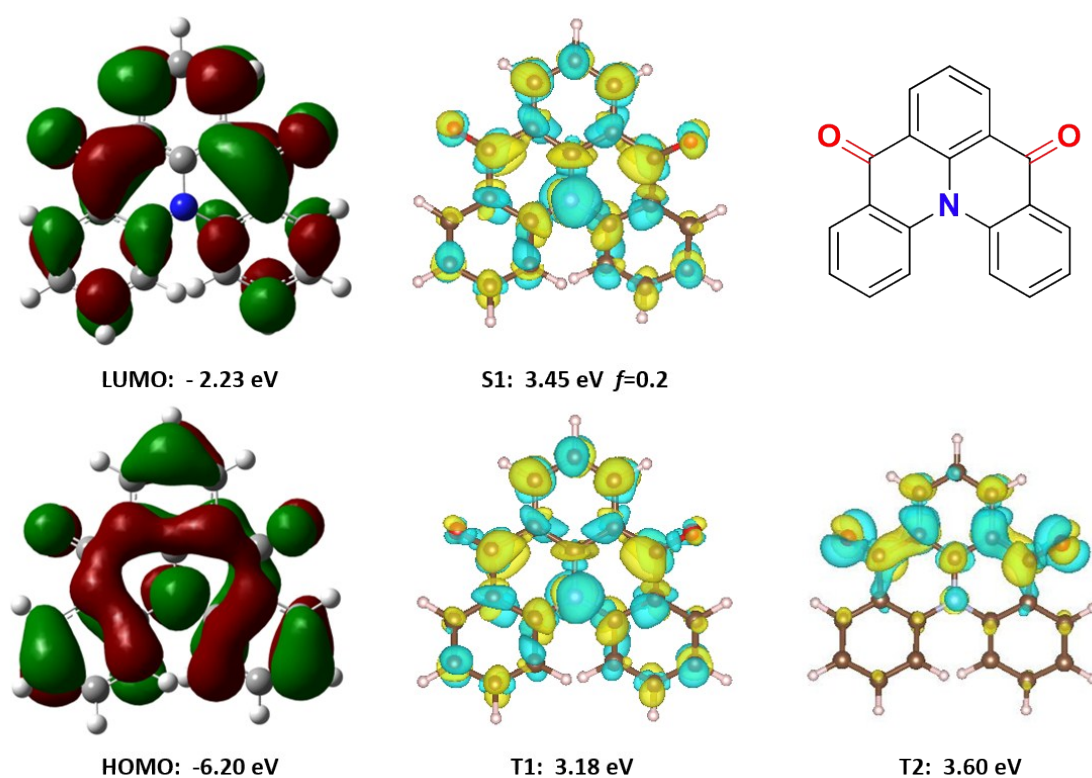

**Figure S2.** Molecular orbitals energy and isocontour plots (cutoff=0.02 a.u.) in the gas phase obtained at PBE0/6-31G(d,p) level (*top* and *bottom left*). Difference density plots with respect to the gas phase ground state for S<sub>1</sub>, T<sub>1</sub> and T<sub>2</sub> excited states for **DiKTa** calculated at SCS-CC2/cc-pVDZ level.  $f$  indicates the oscillator strength.

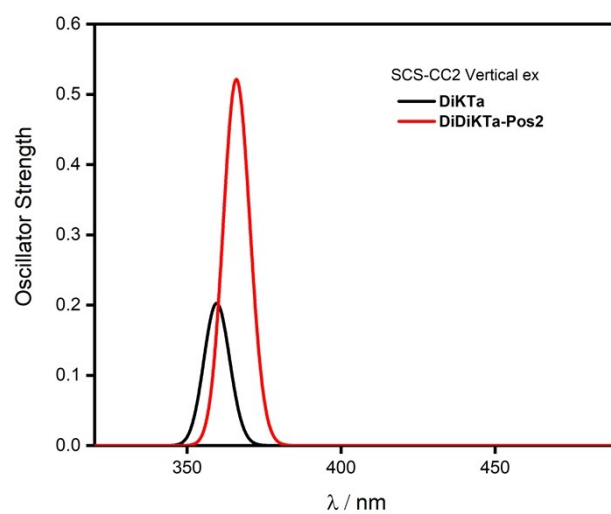

**Figure S3.** Simulated absorption spectra for **DiKTa** and **DDiKTa** based on SCS-CC2/cc-pVDZ. The y-axis intensity scale indicates the oscillator strength.

The computationally predicted fluorescence rate ( $k_f$ ), where  $f$  is oscillator strength (unitless) and  $\Delta E$  is vertical energy ( $\text{cm}^{-1}$ ) is calculated according.<sup>17</sup>

$$k_f = \frac{f\Delta E^2}{1.499}$$

**Table S1.** Calculated vertical excited states properties of **DiKTa** obtained using SCS-CC2/cc-pVDZ in the gas phase.

| Excited state  | Energy / eV | $f$  | single electron contribution / % | Nature                                                                                                              | Charge Transferred | DCT   | Overlap integral | $k_f / \times 10^{-8} \text{ s}^{-1}$ |
|----------------|-------------|------|----------------------------------|---------------------------------------------------------------------------------------------------------------------|--------------------|-------|------------------|---------------------------------------|
| T <sub>1</sub> | 3.18        |      | 97.22                            | H→L 82% H3→L 5% H5→L1 3% H8→L 2%                                                                                    | 0.592              | 0.606 | 0.99             | N/A                                   |
| S <sub>1</sub> | 3.45        | 0.20 | 88.49                            | H→L 86% H2→L3 3%                                                                                                    | 0.591              | 0.812 | 0.98             | N/A                                   |
| T <sub>2</sub> | 3.60        |      | 98                               | H2→L 21%<br>H5→L 17%<br>H→L1 16%<br>H7→L 11%<br>H6→L1 6%<br>H2→L4 5%<br>H1→L3 4%<br>H4→L 3%<br>H3→L3 2%<br>H1→L3 2% | 0.483              | 0.242 | 0.98             | 1.05                                  |

Where H = HOMO, H1 = HOMO -1, H2 = HOMO -2, H3 = HOMO -3, H4 = HOMO -4, H5 = HOMO -5, H6 = HOMO -6, L = LUMO, L1 = LUMO +1, L2 = LUMO +2, L3 = LUMO +3, CT = charge transferred, DCT = distance of charge transferred,  $f$  = oscillator strength

**Table S2.** Calculated vertical excited states properties of **DDiKTa** obtained using SCS-CC2/cc-pVDZ in the gas phase.

| Excited state | Energy / eV | $f$  | single electron contribution / % | Transition                            | CT    | DCT   | Overlap integral | $k_f / \times 10^{-8} \text{ s}^{-1}$ |
|---------------|-------------|------|----------------------------------|---------------------------------------|-------|-------|------------------|---------------------------------------|
| T1            | 3.12        |      | 97.23                            | H→L1 48%<br>H1→L 29% H→L2 3% H6→L2 2% | 0.545 | 0.335 | 0.99             | N/A                                   |
| T2            | 3.13        |      | 97.14                            | H→L 49% H1→L1 33% H6→L 2%<br>H2→L 2%  | 0.577 | 0.405 | 0.99             | N/A                                   |
| S1            | 3.39        | 0.52 | 88.5                             | H→L1 52% H1→L 33% H2→L1 2%            | 0.582 | 0.473 | 0.98             | 2.600                                 |
| S2            | 3.39        | 0.01 | 88.47                            | H→L 53% H1→L1 32% H2→L 2%             | 0.572 | 0.519 | 0.98             | 0.457                                 |

Where H = HOMO, H1 = HOMO -1, H2 = HOMO -2, H6 = HOMO -6, L = LUMO, L1 = LUMO +1, L2 = LUMO +2, CT = charge transferred, DCT = distance of charge transferred,  $f$  = oscillator strength

## Photophysical characterization

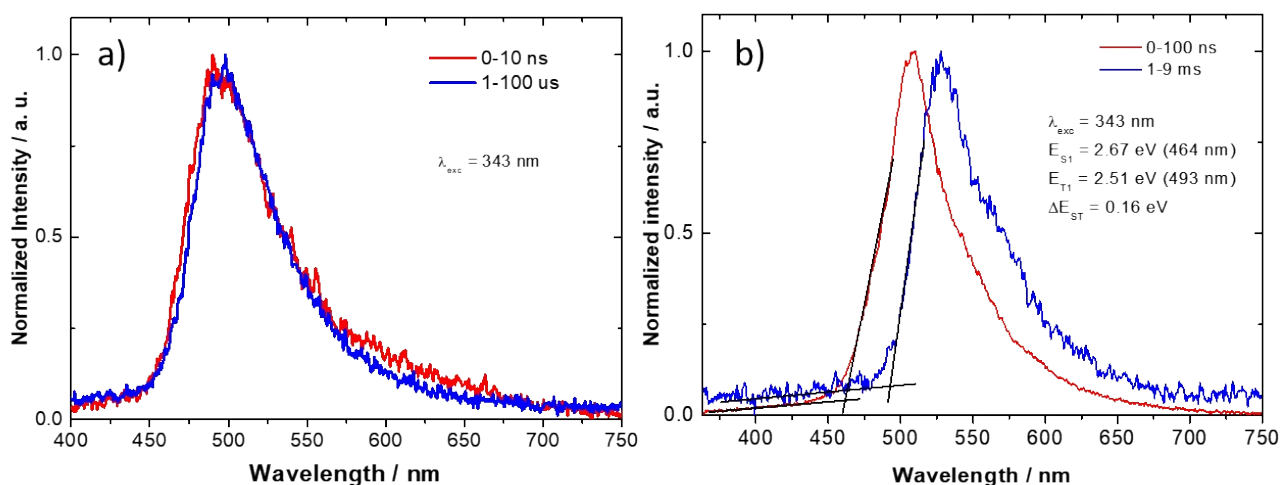

**Figure S4.** Time-resolved spectra of 9 wt% **DDiKTa** dispersed in DPEPO matrix; a) prompt emission (0 ns delay and 10 ns integration time) and delayed fluorescence (1  $\mu$ s delay and 100  $\mu$ s integration time) at room temperature; b) Prompt fluorescence (0 ns delay and 100 ns integration time) and phosphorescence spectrum (1 ms delay and 100 ms integration time) at 77 K.  $\lambda_{\text{exc}} = 343$  nm.

**Table S3.** Electrochemical data and theoretical properties of **DDiKTa** and **DiKTa**

|               | Electrochemical potential <sup>a</sup> |                                    |                              | Theoretical <sup>e</sup> |              |                |                                |
|---------------|----------------------------------------|------------------------------------|------------------------------|--------------------------|--------------|----------------|--------------------------------|
|               | $E_{\text{ox}}^{\text{b}}$<br>/ V      | $E_{\text{red}}^{\text{c}}$<br>/ V | $\Delta E^{\text{d}}$<br>/ V | HOMO<br>/ eV             | LUMO<br>/ eV | $f^{\text{f}}$ | $\Delta E_{\text{ST}}$<br>/ eV |
| <b>DDiKTa</b> | 1.63                                   | -1.27                              | 2.90                         | -6.04                    | -2.34        | 0.52           | 0.27                           |
| <b>DiKTa</b>  | 1.65                                   | -1.33                              | 2.98                         | -6.20                    | -2.23        | 0.20           | 0.27                           |

<sup>a</sup> Potential values were obtained from the DPV peak values and referenced with respect to SCE ( $\text{Fc}/\text{Fc}^+ = 0.46$  eV), the measurement of **DDiKTa** was performed in DCM while the measurement of **DiKTa** was performed in MeCN;<sup>18</sup> <sup>b</sup> Oxidation potential calculated from the DPV peak value; <sup>c</sup> Reduction potential calculated from the DPV peak value; <sup>d</sup>  $\Delta E = E_{\text{ox}} - E_{\text{red}}$ ; <sup>e</sup> Calculated in the gas phase at SCS-CC2/cc-pVDZ level; <sup>f</sup> Calculated oscillator strength of  $S_1$ .

**Table S4.** Optoelectronic properties of **DDiKTa** and **DiKTa**

|                            | In toluene                                |                                                                    |                                          |                                      |                                           |                                            | In film <sup>g</sup>             |                                      |                                |                               |
|----------------------------|-------------------------------------------|--------------------------------------------------------------------|------------------------------------------|--------------------------------------|-------------------------------------------|--------------------------------------------|----------------------------------|--------------------------------------|--------------------------------|-------------------------------|
|                            | $\lambda_{\text{abs}}^{\text{a}}$<br>/ nm | $\epsilon$<br>/ $\times 10^{-3}$<br>$\text{M}^{-1} \text{cm}^{-1}$ | $\lambda_{\text{PL}}^{\text{b}}$<br>/ nm | $\Phi_{\text{PL}}^{\text{c}}$<br>/ % | $\Delta E_{\text{ST}}^{\text{d}}$<br>/ eV | FWHM <sup>e</sup><br>/ nm/cm <sup>-1</sup> | $\lambda_{\text{PL}}$<br>/<br>nm | $\Phi_{\text{PL}}^{\text{f}}$<br>/ % | $\Delta E_{\text{ST}}$<br>/ eV | FWHM<br>/ nm/cm <sup>-1</sup> |
| <b>DDiKTa</b>              | 444                                       | 10.4                                                               | 470                                      | 29                                   | 0.21                                      | 47/1639                                    | 490                              | 72                                   | 0.16                           | 61/2434                       |
| <b>DiKTa</b> <sup>18</sup> | 435                                       | 21                                                                 | 453                                      | 26                                   | 0.20                                      | 27/1251                                    | 470                              | 16                                   | 0.20                           | 43/1857                       |

<sup>a</sup> UV-vis absorption of CT transition; <sup>b</sup> PL in toluene degassing with N<sub>2</sub>; <sup>c</sup> Photoluminescence quantum yield in toluene relative to quinine sulfate in 1N H<sub>2</sub>SO<sub>4</sub> ( $\Phi_{\text{PL}} = 54.6\%$ );<sup>11</sup> <sup>d</sup> Energy gap between S<sub>1</sub> and T<sub>1</sub> calculated from the difference of the onsets of the fluorescence and phosphorescence spectra in toluene glass at 77 K; <sup>e</sup> Full wavelength at half maximum; <sup>f</sup> Obtained using an integrating sphere under N<sub>2</sub>; <sup>g</sup> 9 wt% **DDiKTa** doped in DPEPO, 10wt% DiKTa doped in mCP.

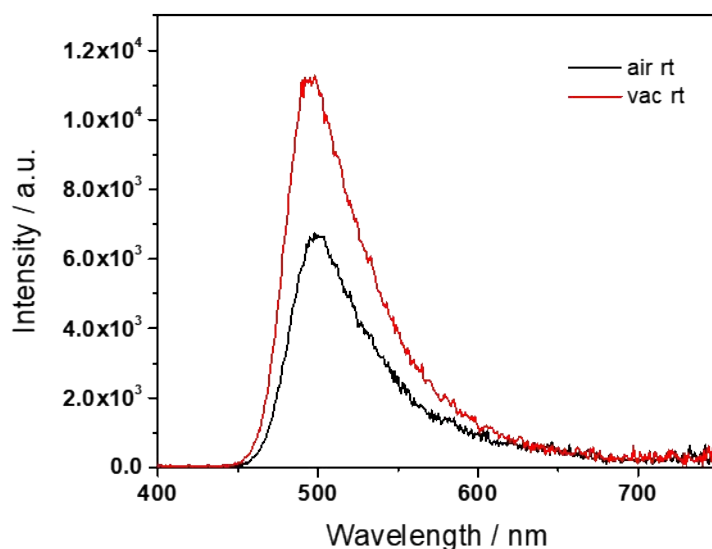

**Figure S5.** Comparison of steady-state PL spectra of 9 wt% **DDiKTa** dispersed in DPEPO matrix at room temperature under N<sub>2</sub> and air.  $\lambda_{\text{exc}} = 330$  nm.

**Table S5.** Transient PL decay data of 9 wt% **DDiKTa** dispersed in DPEPO matrix at various temperature

| T / K | $\tau_1$ / ns | $\tau_2$ / ns | A1    | A2  | Rel%-1 / % | Rel%-2 / % |
|-------|---------------|---------------|-------|-----|------------|------------|
| 300   | 7.25          | 1168.9        | 13566 | 105 | 44         | 56         |
| 250   | 7.54          | 1163.9        | 14123 | 105 | 46         | 54         |
| 200   | 7.56          | 1125.7        | 15677 | 97  | 52         | 48         |
| 150   | 7.70          | 1083.3        | 16416 | 106 | 50         | 50         |
| 77    | 8.22          | 1001.2        | 15568 | 112 | 49         | 51         |

**Table S6.** Photophysical properties and calculated rate constants of 9 wt% **DDiKTa** dispersed in DPEPO matrix at various temperature

| T / K | $\phi_{\text{PL}} / \%$ | $\phi_{\text{f}} / \%$ | $\phi_{\text{d}} / \%$ | $k_{\text{f}} / \text{s}^{-1}$ | $k_{\text{d}} / \text{s}^{-1}$ | $k_{\text{rS}} / \text{s}^{-1}$ | $k_{\text{ISC}} / \text{s}^{-1}$ | $k_{\text{RISC}} / \text{s}^{-1}$ | $k_{\text{nrT}} / \text{s}^{-1}$ |
|-------|-------------------------|------------------------|------------------------|--------------------------------|--------------------------------|---------------------------------|----------------------------------|-----------------------------------|----------------------------------|
| 300   | 72%                     | 32%                    | 40%                    | 4.41E+07                       | 3.42E+05                       | 1.41E+07                        | 3.00E+07                         | 6.30E+05                          | 1.41E+05                         |
| 280   | 67%                     | 30%                    | 37%                    | 4.22E+07                       | 3.35E+05                       | 1.28E+07                        | 2.94E+07                         | 5.83E+05                          | 1.59E+05                         |
| 260   | 66%                     | 31%                    | 35%                    | 4.06E+07                       | 3.03E+05                       | 1.24E+07                        | 2.82E+07                         | 5.02E+05                          | 1.49E+05                         |
| 240   | 64%                     | 32%                    | 32%                    | 4.39E+07                       | 3.00E+05                       | 1.43E+07                        | 2.96E+07                         | 4.39E+05                          | 1.58E+05                         |
| 220   | 63%                     | 33%                    | 30%                    | 4.64E+07                       | 2.79E+05                       | 1.56E+07                        | 3.08E+07                         | 3.70E+05                          | 1.55E+05                         |
| 210   | 61%                     | 33%                    | 28%                    | 4.66E+07                       | 2.50E+05                       | 1.56E+07                        | 3.10E+07                         | 3.18E+05                          | 1.44E+05                         |

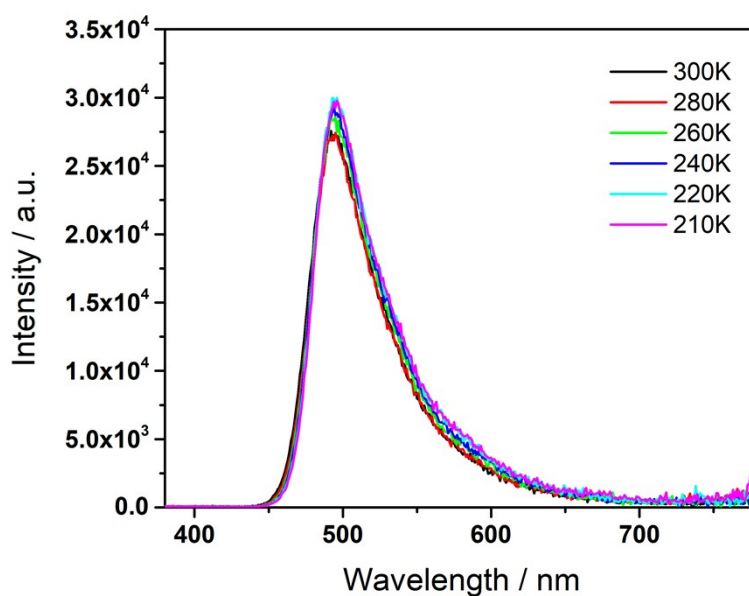

**Figure S6.** Temperature dependent steady state PL spectra of 9 wt% **DDiKTa** in DPEPO ( $\lambda_{\text{exc}} = 330 \text{ nm}$ )



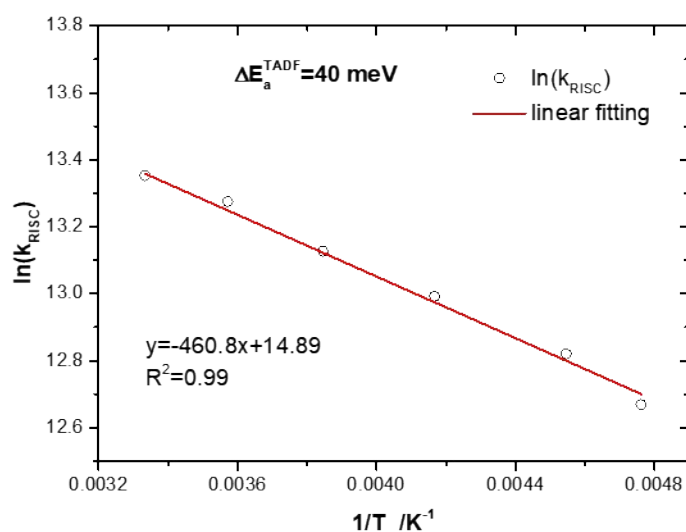

**Figure S7.** Arrhenius plot of 9 wt% **DDiKTa** in DPEPO

**Table S7.** Summary of solvatochromic PL properties of **DDiKTa**

| Solvent                                 | $\lambda_{\text{PL}}^{\text{a}}$<br>nm | FWHM <sup>b</sup><br>nm / cm-1 |
|-----------------------------------------|----------------------------------------|--------------------------------|
| Hexane (Hex)                            | 457                                    | 32 / 1514                      |
| Toluene (Tol)                           | 466                                    | 38 / 1701                      |
| Diethyl ether ( $\text{Et}_2\text{O}$ ) | 462                                    | 36 / 1646                      |
| Ethyl acetate (EA)                      | 472                                    | 44 / 1929                      |
| THF                                     | 474                                    | 44 / 1929                      |
| $\text{CHCl}_3$                         | 479                                    | 43 / 1843                      |

<sup>a</sup> Peak value of PL spectra obtained under aerated conditions at 298 K, concentration  $2.3 \times 10^{-5}$  M,  $\lambda_{\text{exc}} = 330$  nm. <sup>b</sup> Full wavelength at half maximum of corresponding PL spectra

## NMR spectra

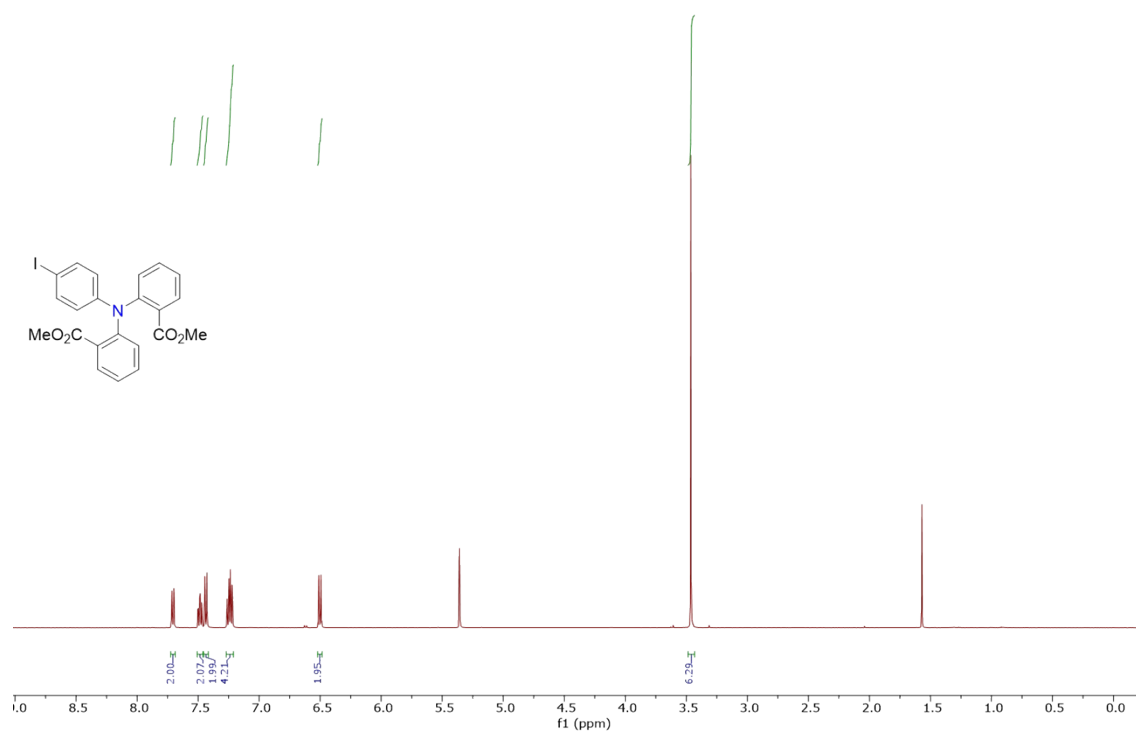

**Figure S7.** <sup>1</sup>H NMR of dimethyl 2,2'-((4-iodophenyl)azanediyl)dibenzoate (1)

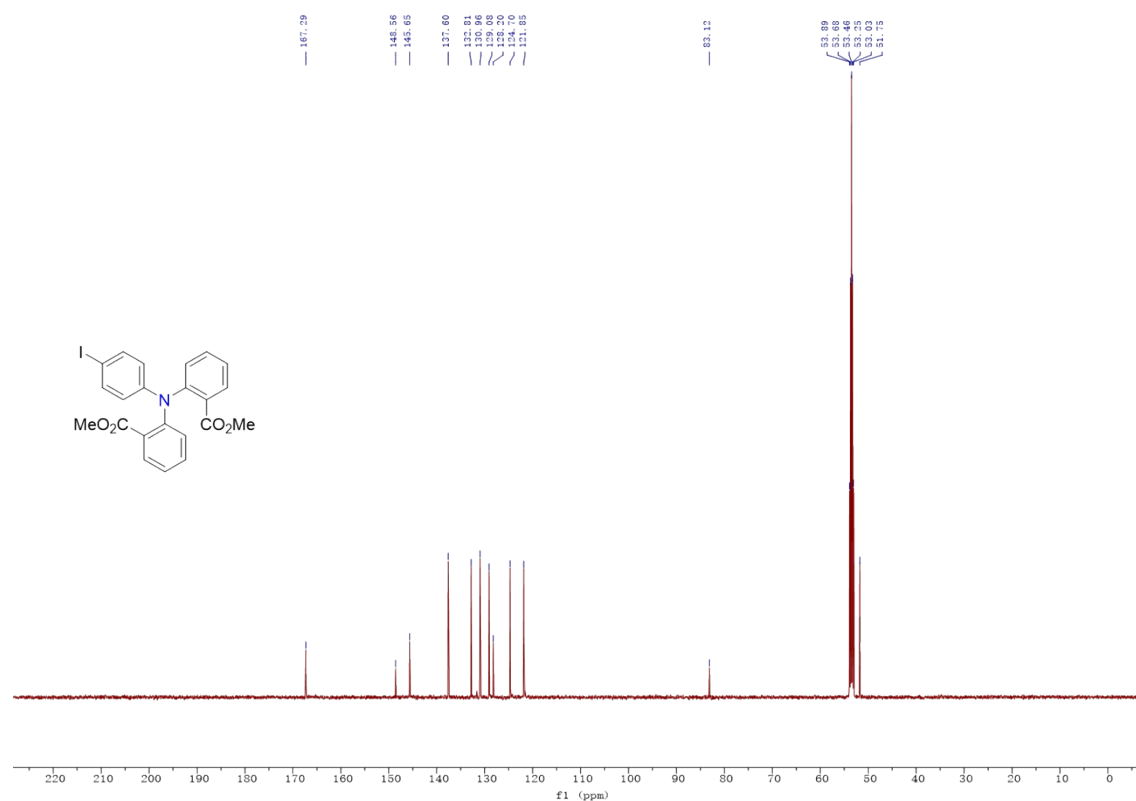

**Figure S8.** <sup>13</sup>C NMR of dimethyl 2,2'-((4-iodophenyl)azanediyl)dibenzoate (1)

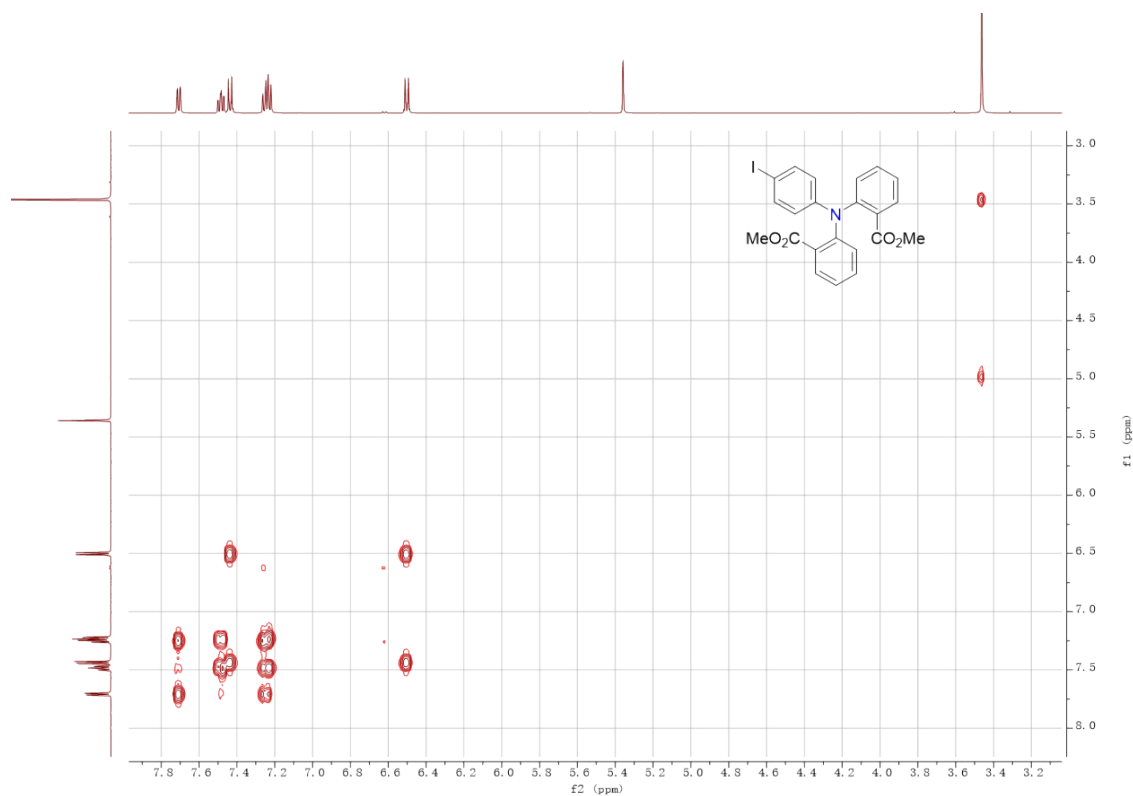

**Figure S9.** 2D  $^1\text{H}$ - $^1\text{H}$  COSY NMR of dimethyl 2,2'-((4-iodophenyl)azanediyl)dibenzoate (**1**)

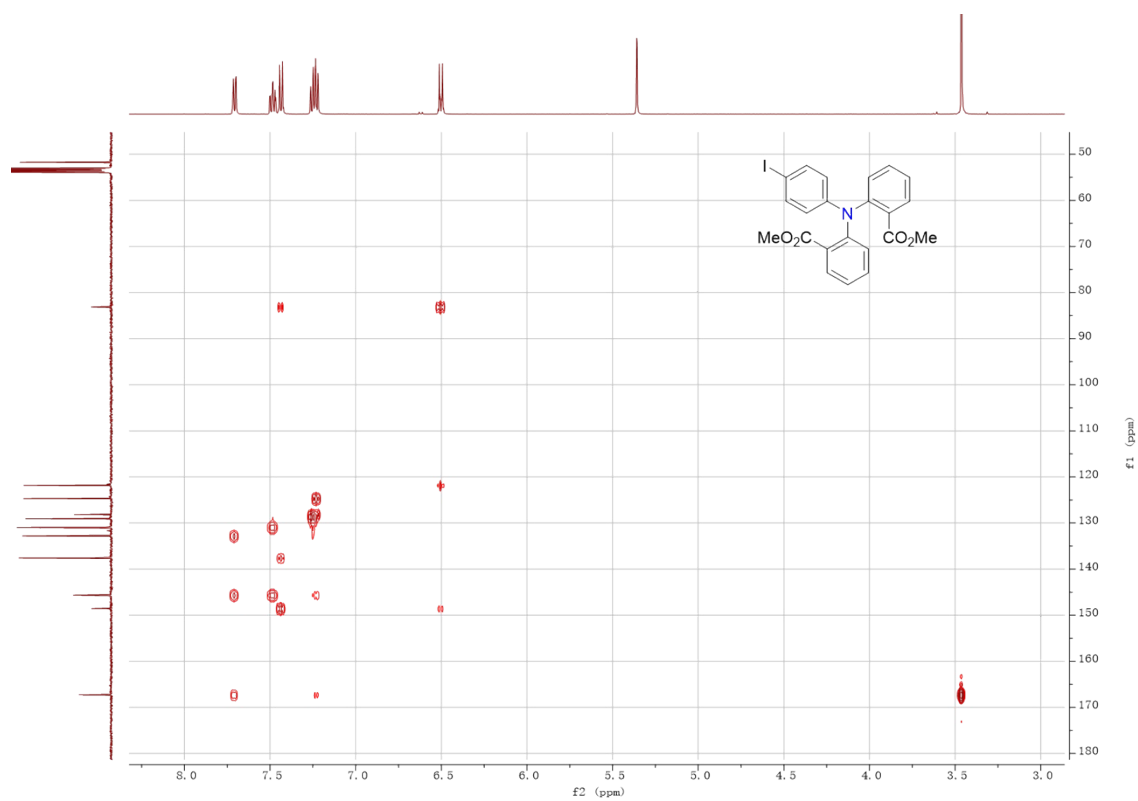

**Figure S10.** 2D  $^1\text{H}$ - $^{13}\text{C}$  HSQC NMR of dimethyl 2,2'-((4-iodophenyl)azanediyl)dibenzoate (**1**)

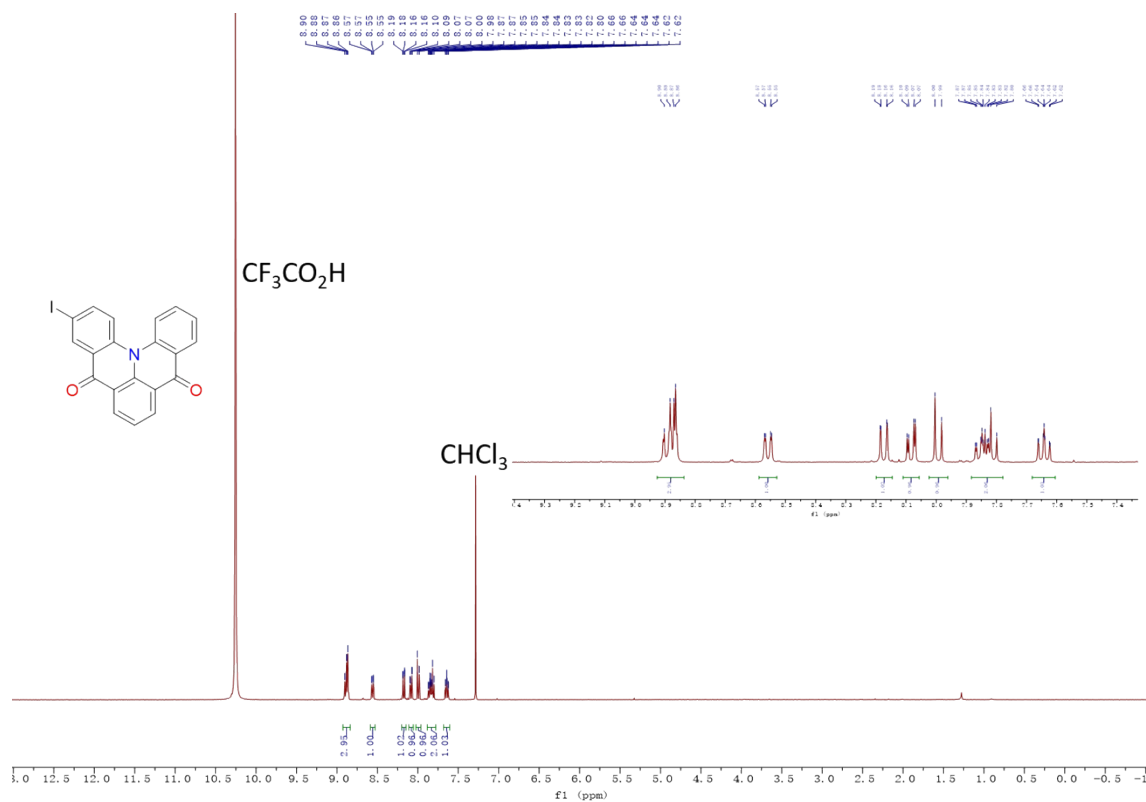

**Figure S11.** <sup>1</sup>H NMR of 3-iodoquinolino[3,2,1-de]acridine-5,9-dione (**2**) (a drop of Trifluoroacetic acid was added in CDCl<sub>3</sub> to improve the solubility)

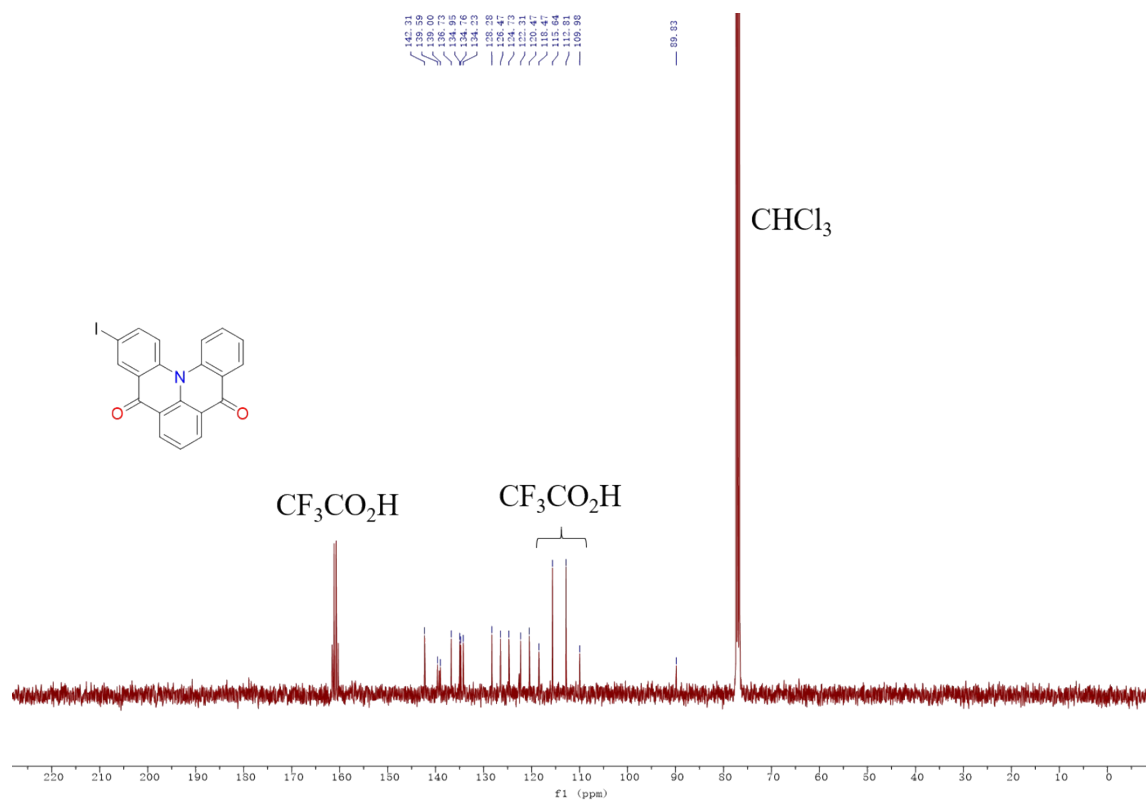

**Figure S12.**  $^{13}\text{C}$  NMR of **3-iodoquinolino[3,2,1-de]acridine-5,9-dione (2)** (a drop of Trifluoroacetic acid was added in  $\text{CDCl}_3$  to improve the solubility)

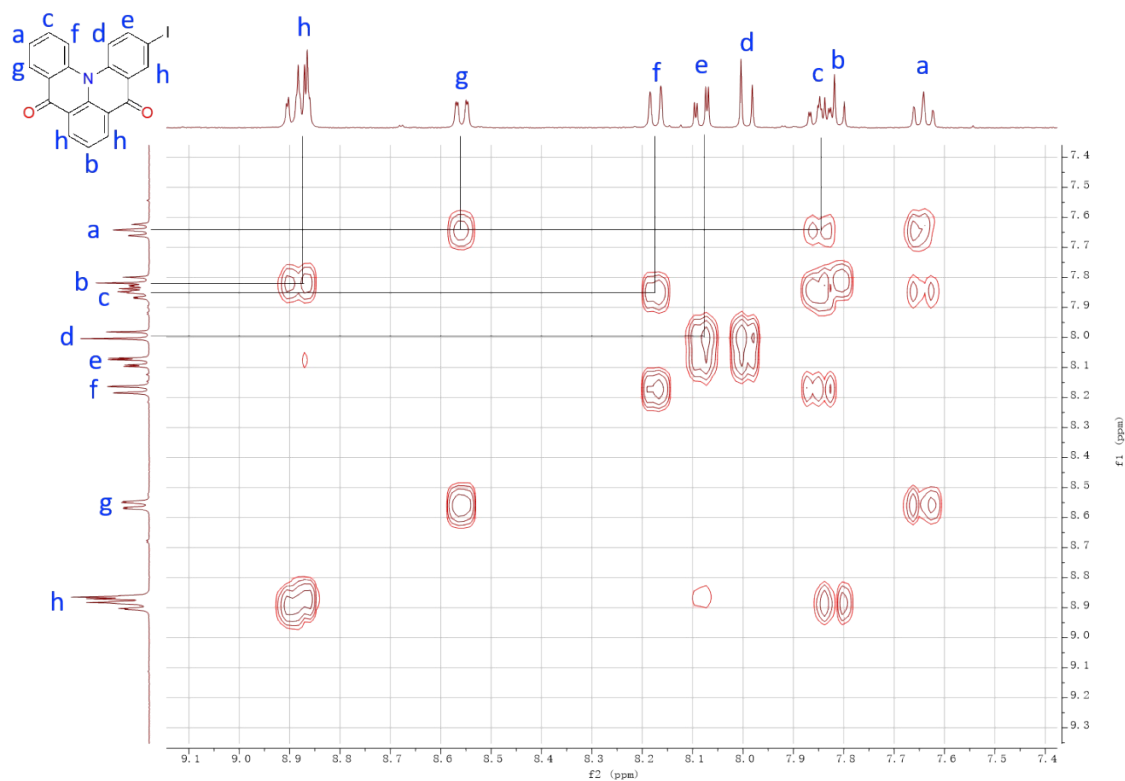

**Figure S13.** 2D  $^1\text{H}$ - $^1\text{H}$  COSY NMR of **3-iodoquinolino[3,2,1-de]acridine-5,9-dione (2)** (a drop of Trifluoroacetic acid was added in  $\text{CDCl}_3$  to improve the solubility)

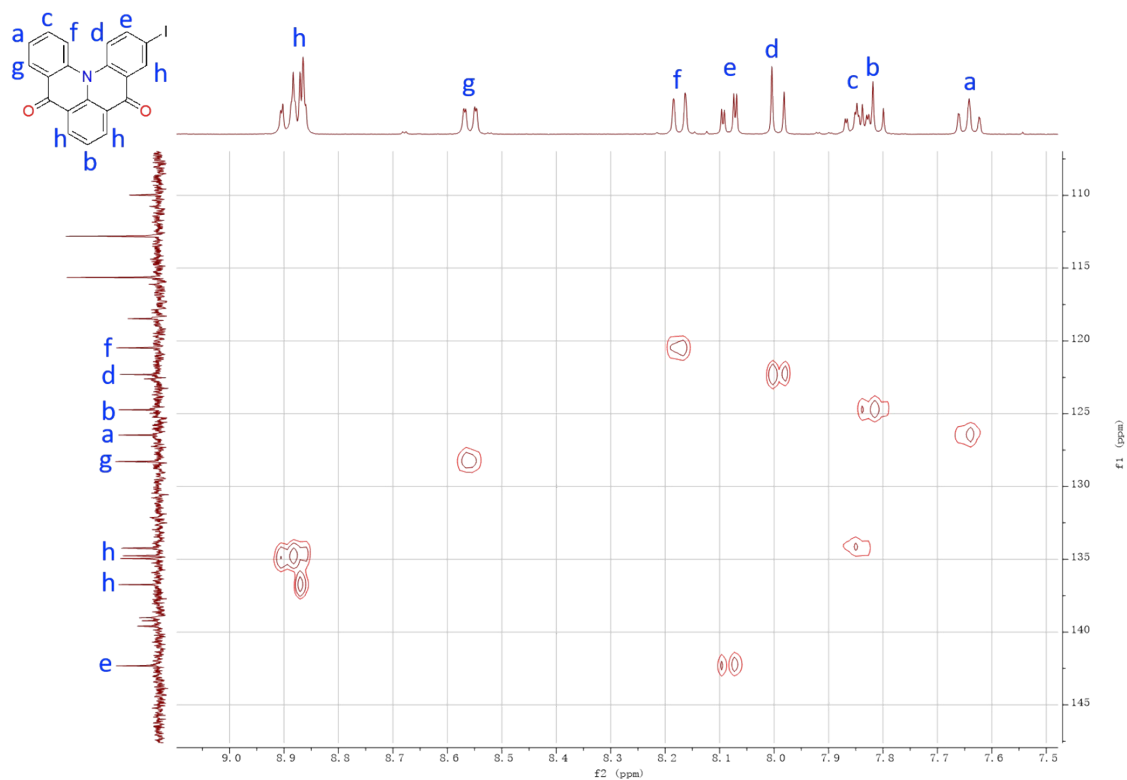

**Figure S14.** 2D  $^1\text{H}$ - $^{13}\text{C}$  HSQC NMR of 3-iodoquinolino[3,2,1-de]acridine-5,9-dione (2) (a drop of Trifluoroacetic acid was added in  $\text{CDCl}_3$  to improve the solubility)

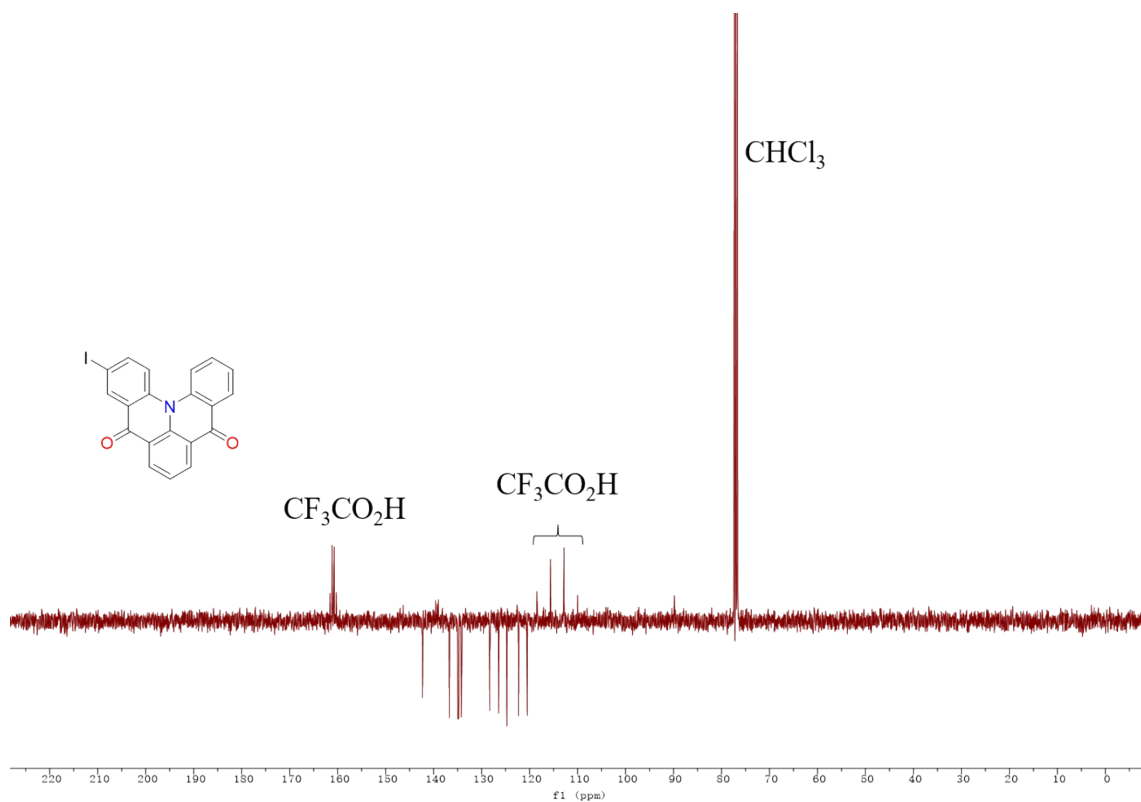

**Figure S15.** DEPTQ NMR of **3-iodoquinolino[3,2,1-de]acridine-5,9-dione (2)** (a drop of Trifluoroacetic acid was added in  $\text{CDCl}_3$  to improve the solubility)

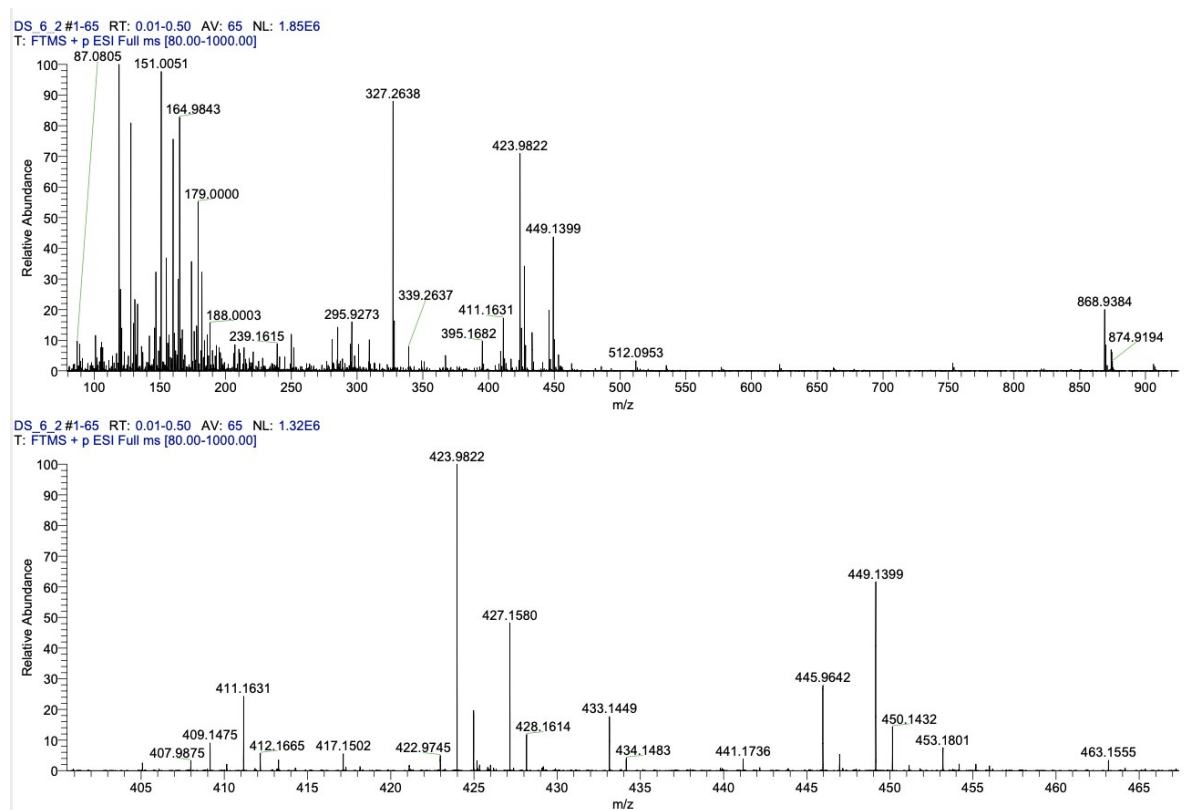

**Figure S16.** HRMS of **3-iodoquinolino[3,2,1-de]acridine-5,9-dione (2)**

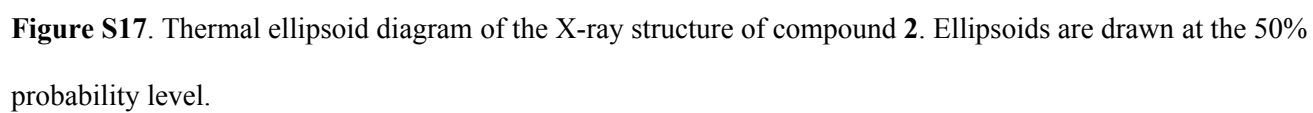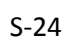



**Figure S18.**  $^1\text{H}$  NMR of 3-(4,4,5,5-tetramethyl-1,3,2-dioxaborolan-2-yl)quinolino[3,2,1-de]acridine-5,9-dione (3)

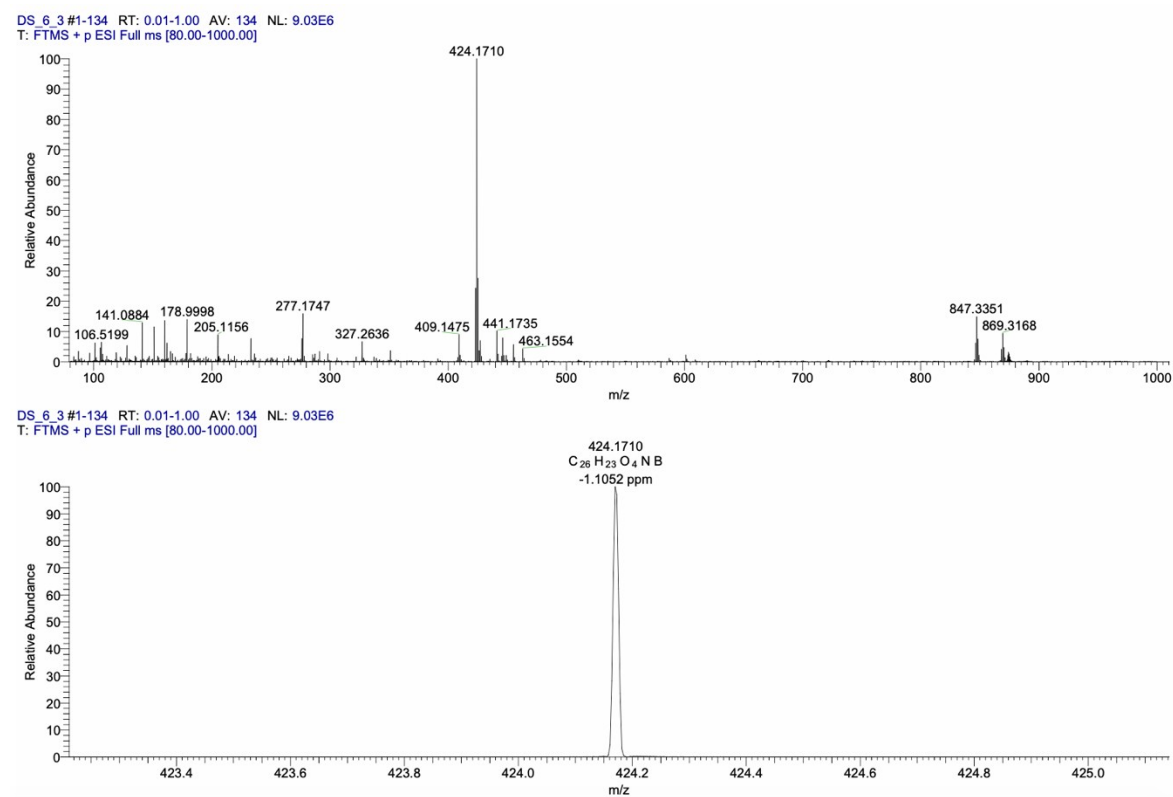

**Figure S19.** HRMS of 3-(4,4,5,5-tetramethyl-1,3,2-dioxaborolan-2-yl)quinolino[3,2,1-de]acridine-5,9-dione (3)



**Figure S21.**  $^{13}\text{C}$  NMR of [3,3'-biquinolino[3,2,1-de]acridine]-5,5',9,9'-tetraone (DDiKTa) (a drop of Trifluoroacetic acid was added in  $\text{CDCl}_3$  to improve the solubility)

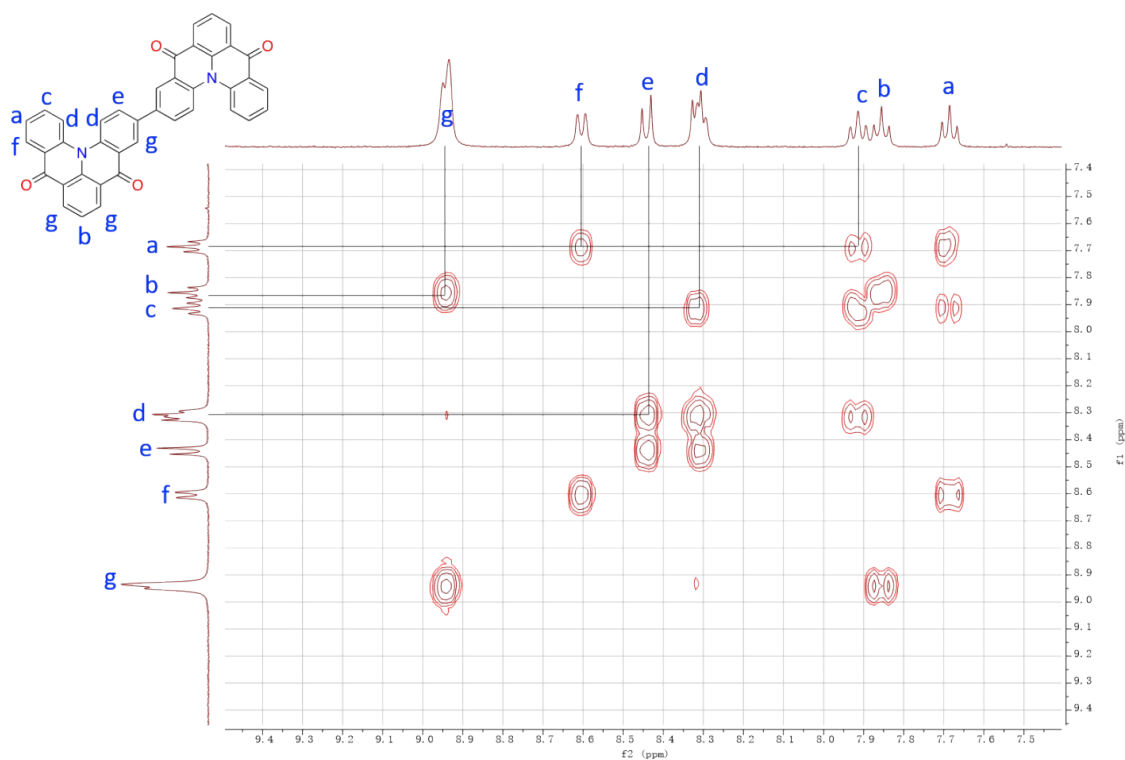

**Figure S22.** 2D  $^1\text{H}$ - $^1\text{H}$  COSY NMR of [3,3'-biquinolino[3,2,1-de]acridine]-5,5',9,9'-tetraone (DDiKTa) (a drop of Trifluoroacetic acid was added in  $\text{CDCl}_3$  to improve the solubility)

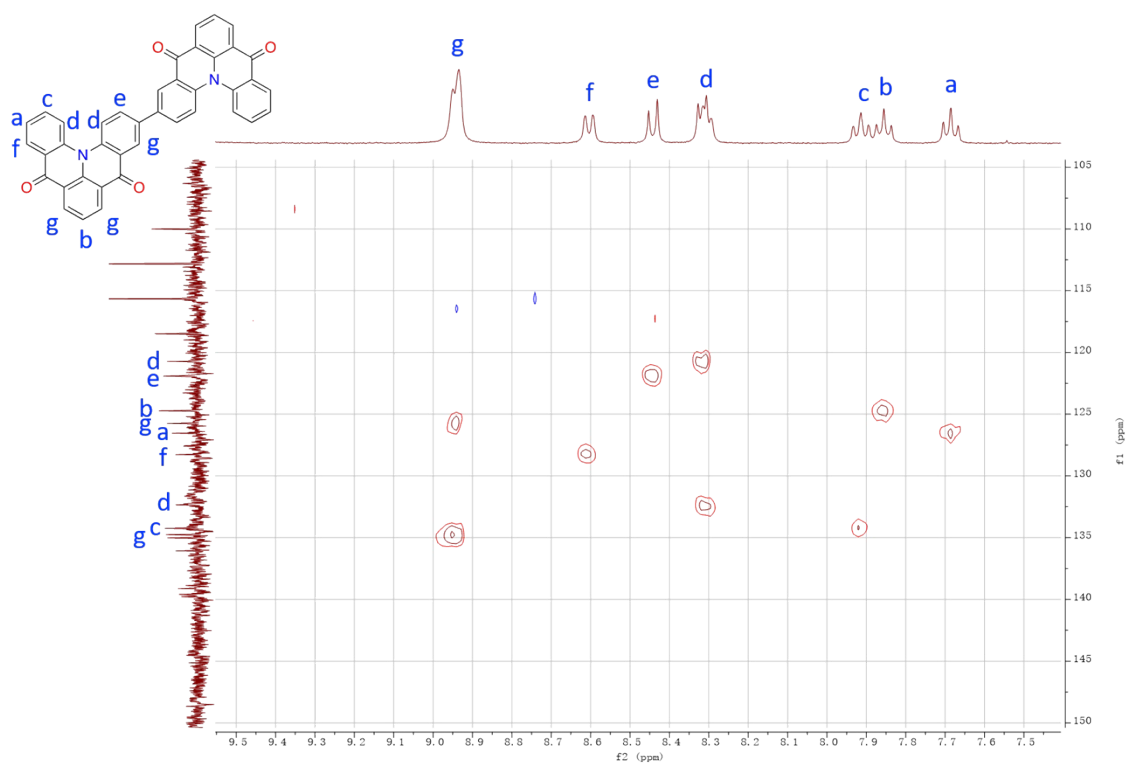

**Figure S23.** 2D  $^1\text{H}$ - $^{13}\text{C}$  HSQC NMR of [3,3'-biquinolino[3,2,1-de]acridine]-5,5',9,9'-tetraone (DDiKTa) (a drop of Trifluoroacetic acid was added in  $\text{CDCl}_3$  to improve the solubility)

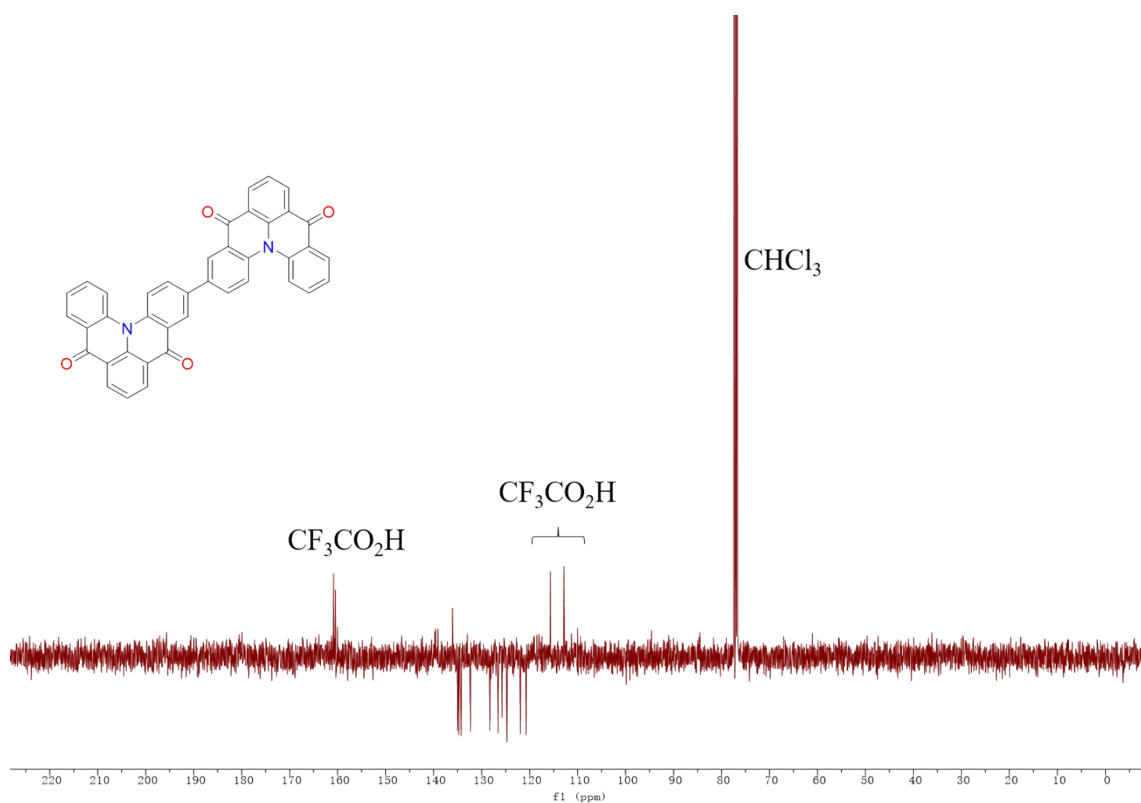

**Figure S24.** DEPTQ NMR of [3,3'-biquinolino[3,2,1-de]acridine]-5,5',9,9'-tetraone (DDiKTa) (a drop of Trifluoroacetic acid was added in CDCl<sub>3</sub> to improve the solubility)

**Coordinates of DDiKTa calculated using SCS-CC2 / ccpVDZ in the gas phase.**

|                   |                   |                   |   |
|-------------------|-------------------|-------------------|---|
| 4.95793534735043  | 13.43771405076456 | -4.41358069043075 | c |
| 5.41239476497736  | 10.90431717048721 | -3.77197811401312 | c |
| 2.79653034757396  | 14.64768869214191 | -3.46249145832795 | c |
| 3.72342798247889  | 9.55838119692992  | -2.21241602284050 | c |
| 7.08123985753156  | 9.89144515566811  | -4.45722143225433 | h |
| 1.09964884788413  | 13.36739242988234 | -1.85826184563885 | c |
| 2.35612319807003  | 16.61407363452878 | -3.93147194541142 | h |
| 1.54930531930842  | 10.79413566933724 | -1.22632978221433 | c |
| 4.24991774392697  | 6.86929747769631  | -1.60710191583484 | c |
| -1.15102685136586 | 14.72271794673996 | -0.86612563428746 | c |
| -0.13902085832340 | 9.48736496085910  | 0.34873184201251  | n |
| 2.05101820394880  | 5.49329516769113  | -0.52543731811060 | c |
| 6.28129839581124  | 5.81691206146236  | -2.11973410725965 | o |
| -2.40743962144821 | 13.42479447200228 | 1.28608043525103  | c |
| -1.81205396780871 | 16.83249337697617 | -1.64358148248113 | o |
| -0.13256146826974 | 6.80921940815973  | 0.30343458317480  | c |
| -1.78922928970057 | 10.89755768445314 | 1.92897073379755  | c |
| 2.08721438273522  | 2.82465677871551  | -0.53363451281147 | c |
| -4.09277789302999 | 14.81913711515319 | 2.82502945298110  | c |
| -2.31954934465030 | 5.38563675301322  | 0.92669618137643  | c |
| -2.71912163040334 | 9.88124073939153  | 4.23000030063786  | c |
| 3.81785735415096  | 1.91849815950419  | -1.21649755147382 | h |
| -0.02476311024110 | 1.40315181845384  | 0.21073298188407  | c |
| -4.52985689837319 | 16.75353551679266 | 2.23785133918125  | h |
| -5.10450324487173 | 13.76580199776344 | 5.02272755673042  | c |
| -2.24861272600544 | 2.74585447350533  | 0.89358570845288  | c |
| -4.08468782862451 | 6.34433605853555  | 1.40237574180269  | h |
| -4.36286399005914 | 11.30115887513722 | 5.73949856178318  | c |
| -2.11241720446787 | 8.01117966898535  | 4.85909974607781  | h |
| -6.40380436221133 | 14.85309527922162 | 6.20943843579473  | h |

|                   |                    |                   |   |
|-------------------|--------------------|-------------------|---|
| -3.95879273273818 | 1.69973647071117   | 1.41096222092302  | h |
| -5.04592019696744 | 10.48603044683365  | 7.51568904192719  | h |
| 6.27230680515498  | 14.45758382077353  | -5.64263688449788 | h |
| 0.02425109559166  | -1.40339632538300  | 0.21070726463520  | c |
| 2.24792129133633  | -2.74610664283402  | 0.89413890081594  | c |
| -2.08752516486054 | -2.82489336251039  | -0.53424389898067 | c |
| 2.31884056708336  | -5.38588903760450  | 0.92726406370533  | c |
| 3.95797184901888  | -1.69999472063165  | 1.41195503306416  | h |
| -2.05133840910105 | -5.49353140223992  | -0.52604982792536 | c |
| -3.81797393178365 | -1.91872952294544  | -1.21759111005442 | h |
| 0.13203283221717  | -6.80946337063935  | 0.30335256689201  | c |
| 4.08379979878561  | -6.34459836443861  | 1.40359839984236  | h |
| -4.24997970275802 | -6.86952987777931  | -1.60824717867293 | c |
| 0.13850690547606  | -9.48760248893055  | 0.34867595037967  | n |
| -3.72345804607219 | -9.55869152887350  | -2.21318871516213 | c |
| -6.28115389848461 | -5.81708262437850  | -2.12157919959283 | o |
| 1.78858585506765  | -10.89765933957692 | 1.92916278776815  | c |
| -1.54958458640764 | -10.79445240477859 | -1.22656222348581 | c |
| -5.41218632823539 | -10.90468447950253 | -3.77296113751331 | c |
| 2.71964911666060  | -9.88049637242535  | 4.22934468084187  | c |
| 2.40672313154477  | -13.42502448036265 | 1.28670779324080  | c |
| -1.09999051980626 | -13.36781651348168 | -1.85809917382897 | c |
| -7.08081650493700 | -9.89177152467932  | -4.45866602812116 | h |
| -4.95776325347439 | -13.43817844978395 | -4.41420479540559 | c |
| 4.36440646306727  | -11.29974217219805 | 5.73836614081292  | c |
| 2.11312587375615  | -8.01027787988062  | 4.85815724438831  | h |
| 4.09278239853798  | -14.81882241970567 | 2.82536360711647  | c |
| 1.15034663022291  | -14.72325005224750 | -0.86534143298581 | c |
| -2.79664495748124 | -14.64818955985391 | -3.46250679738906 | c |
| -6.27192286762588 | -14.45808361135206 | -5.64345761673535 | h |
| 5.04864693242768  | -10.48383004231892 | 7.51374004558772  | h |
| 5.10569041101160  | -13.76464442838555 | 5.02211191382951  | c |

|                   |                    |                   |   |
|-------------------|--------------------|-------------------|---|
| 4.52938506962499  | -16.75351467828671 | 2.23879918475277  | h |
| 1.81111214522531  | -16.83333447494352 | -1.64219010964305 | o |
| -2.35629891427453 | -16.61467388396090 | -3.93112456510911 | h |
| 6.40564338730346  | -14.85147849135818 | 6.20852876489953  | h |



## References

1. Connelly, N. G.; Geiger, W. E., Chemical redox agents for organometallic chemistry. *Chem. Rev.* **1996**, *96*, 877-910.
2. Cardona, C. M.; Li, W.; Kaifer, A. E.; Stockdale, D.; Bazan, G. C., Electrochemical Considerations for Determining Absolute Frontier Orbital Energy Levels of Conjugated Polymers for Solar Cell Applications. *Adv. Mater.* **2011**, *23*, 2367-2371.
3. G. W. T. M. J. Frisch, H. B. Schlegel, G. E. Scuseria, M. A. Robb, J. R. Cheeseman, G. Scalmani, V. Barone, B. Mennucci, G. A. Petersson, H. Nakatsuji, M. Caricato, X. Li, H. P. Hratchian, A. F. Izmaylov, J. Bloino, G. Zheng, J. L. Sonnenberg, M. Hada, M. Ehara, K. Toyota, R. Fukuda, J. Hasegawa, M. Ishida, T. Nakajima, Y. Honda, O. Kitao, H. Nakai, T. Vreven, J. A. Montgomery Jr., J. E. Peralta, F. Ogliaro, M. Bearpark, J. J. Heyd, E. Brothers, K. N. Kudin, V. N. Staroverov, R. Kobayashi, J. Normand, K. Raghavachari, A. Rendell, J. C. Burant, S. S. Iyengar, J. Tomasi, M. Cossi, N. Rega, J. M. Millam, M. Klene, J. E. Knox, J. B. Cross, V. Bakken, C. Adamo, J. Jaramillo, R. Gomperts, R. E. Stratmann, O. Yazyev, A. J. Austin, R. Cammi, C. Pomelli, J. W. Ochterski, R. L. Martin, K. Morokuma, V. G. Zakrzewski, G. A. Voth, P. Salvador, J. J. Dannenberg, S. Dapprich, A. D. Daniels, Ö. Farkas, J. B. Foresman, J. V. Ortiz, J. Cioslowski, D. J. Fox, Gaussian Inc., Wallingford, CT: 2013.
4. TURBOMOLE V6.5, 1989-2007, TURBOMOLE GmbH, since 2007; available from <http://www.turbomole.com>.
5. Adamo, C.; Barone, V., Toward reliable density functional methods without adjustable parameters: The PBE0 model. *J. Chem. Phys.* **1999**, *110*, 6158-6170.
6. Becke, A. D., Dependence of the virial exciton model on basis set and exact-exchange fraction. *J. Chem. Phys.* **2019**, *150*, 241101.
7. R. Dennington, T. Keith; J. Millam, GaussView, Version 5, KS: Semichem Inc.: Shawnee Mission, 2009.
8. Petersson, G.; Al-Laham, M. A., A complete basis set model chemistry. II. Open-shell systems and the total energies of the first-row atoms. *J. Chem. Phys.* **1991**, *94*, 6081-6090.
9. Momma, K.; Izumi, F., VESTA 3 for three-dimensional visualization of crystal, volumetric and morphology data, *J. Appl. Crystallogr.* **2011**, *44*, 1272-1276.
10. Crosby, G. A.; Demas, J. N., Measurement of photoluminescence quantum yields. *Review. J. Phys. Chem.* **1971**, *75*, 991.
11. Melhuish, W. H., Quantum Efficiencies Of Fluorescence Of Organic Substances: Effect Of Solvent And Concentration Of The Fluorescent Solute 1. *J. Phys. Chem.* **1961**, *65*, 229.
12. Greenham, N.; Samuel, I.; Hayes, G.; Phillips, R.; Kessener, Y.; Moratti, S.; Holmes, A.; Friend, R., Measurement of absolute photoluminescence quantum efficiencies in conjugated polymers. *Chem. phys. lett.* **1995**, *241*, 89-96.
13. *CrystalClear-SM Expert v. 2.1*, Rigaku Americas, The Woodlands, Texas, USA, **2015**.
14. *CrysAlisPro v1.171.38.46*. Rigaku Oxford Diffraction, Rigaku Corporation, Oxford, U.K. **2015**.
15. G. Sheldrick; *Acta Crystallogr., Sect. C: Cryst. Struct. Commun.*, **2015**, *71*, 3-8.
16. Dolomanov, O. V.; Bourhis, L. J.; Gildea, R. J.; Howard, J. A. K.; Puschmann, H. *J. Appl. Crystallogr.* **2009**, *42*, 339-341.
17. Lin, L.; Fan, J.; Cai, L.; Wang, C. K., Excited state dynamics of new-type thermally activated delayed fluorescence emitters: theoretical view of light-emitting mechanism. *Mol. Phys.* **2018**, *116*, 19.
18. Hall, D.; Suresh, S. M.; dos Santos, P. L.; Duda, E.; Bagnich, S.; Pershin, A.; Rajamalli, P.; Cordes, D. B.; Slawin, A. M.; Beljonne, D., Improving Processability and Efficiency of Resonant TADF Emitters: A Design Strategy. *Adv. Opt. Mater.* **2020**, *8*, 1901627.
